# Supplementary material
Source: Springer Nature journal article supplement (https://www.springermedizin.de/resource/supplementary/12883_2013_1045_MOESM2_ESM.pdf/9456422)
Supplement: MOESM2 [file 9456422]

**Table 2.** Summary of the responsiveness and floor and ceiling effects of motor performance measures in stroke rehabilitation, n = 190

| Measure                               | Admission,<br>mean (SD)<br>median (IQR) | Discharge,<br>mean (SD)<br>median (IQR) | ES   | SRM  | mES<br>(median and<br>Q3/7) | Number (%)<br>participants<br>that did not<br>change | Floor effect,<br>number (%) |           | Ceiling effect,<br>number (%) |           |
|---------------------------------------|-----------------------------------------|-----------------------------------------|------|------|-----------------------------|------------------------------------------------------|-----------------------------|-----------|-------------------------------|-----------|
|                                       |                                         |                                         |      |      |                             |                                                      | Admission                   | Discharge | Admission                     | Discharge |
| Step Test                             | 0.65 (2.2)<br>0.00 (0.0)                | 4.94 (5.4)<br>3.00 (9.0)                | 1.99 | 0.88 | 0.36                        | 87 (45.8)                                            | 166 (87.4)                  | 87 (45.8) | N/A                           | N/A       |
| Walking<br>velocity<br>(10mWT)        | 0.17m/s (0.3)<br>0.00m/s (0.3)          | 0.60m/s (0.5)<br>0.56m/s (1.0)          | 1.44 | 0.93 | 0.45                        | 51 (26.8)                                            | 127 (66.8)                  | 49 (25.8) | N/A                           | N/A       |
| MAS 3;<br>balanced<br>sitting         | 3.0 (1.9)<br>3.0 (4.0)                  | 4.4 (1.8)<br>5.0 (2.0)                  | 0.72 | 0.71 | 0.50                        | 58 (30.5)                                            | 19 (10.0)                   | 4 (2.1)   | 22 (11.6)                     | 65 (34.2) |
| MAS 4;<br>sitting to<br>standing      | 1.6 (1.7)<br>1.0 (2.0)                  | 3.8 (2.4)<br>5.0 (5.0)                  | 1.27 | 1.00 | 0.50                        | 52 (27.4)                                            | 58 (30.5)                   | 28 (14.7) | 12 (6.8)                      | 83 (43.7) |
| MAS 5;<br>walking                     | 0.96 (1.5)<br>0.00 (2.0)                | 3.1 (2.2)<br>4.0 (5.0)                  | 1.43 | 1.10 | 0.50                        | 61 (32.1)                                            | 115 (60.5)                  | 48 (25.3) | 3 (1.6)                       | 35 (18.4) |
| MAS<br>mobility: sum<br>of items 3-5) | 5.6 (4.0)<br>5.0 (6.0)                  | 11.3 (5.7)<br>13.0 (9.0)                | 1.42 | 1.16 | 0.92                        | 32 (16.8)                                            | 11 (5.8)                    | 3 (1.6)   | 0 (0)                         | 19 (10)   |

Abbreviations: SD – standard deviation, IQR – interquartile range, ES – Effect Size I, SRM – Standardised Response Mean, mES – median-based Effect Size, Q3/7 – 30<sup>th</sup> to 70<sup>th</sup> inter-percentile range, 10mWT – ten-metre walk test, MAS – Motor Assessment Scale, N/A = not applicable
